# Supplementary material
Source: PubMed Central journal article supplement (PMC10661838)
Supplement: NIHMS1943377-supplement-Suppl_Materials.pdf [file NIHMS1943377-supplement-Suppl_Materials.pdf]

Journal of Hepatology, Volume ■

## Supplemental information

**Longitudinal changes in fibrosis markers are associated with risk of cirrhosis and hepatocellular carcinoma in non-alcoholic fatty liver disease**

**George Cholankeril, Jennifer R. Kramer, Jinna Chu, Xian Yu, Maya Balakrishnan, Liang Li, Hashem El-Serag, and Fasiha Kanwal**

# **Longitudinal changes in fibrosis markers are associated with risk of cirrhosis and hepatocellular carcinoma in non-alcoholic fatty liver disease**

George Cholankeril, Jennifer R. Kramer, Jinna Chu, Xian Yu, Maya Balakrishnan, Liang Li, Hashem El-Serag, Fasiha Kanwal

## Table of contents

|               |    |
|---------------|----|
| Fig. S1.....  | 2  |
| Fig. S2.....  | 4  |
| Fig. S3.....  | 5  |
| Table S1..... | 6  |
| Table S2..... | 7  |
| Table S3..... | 8  |
| Table S4..... | 9  |
| Table S5..... | 10 |
| Table S6..... | 11 |
| Table S7..... | 12 |

A

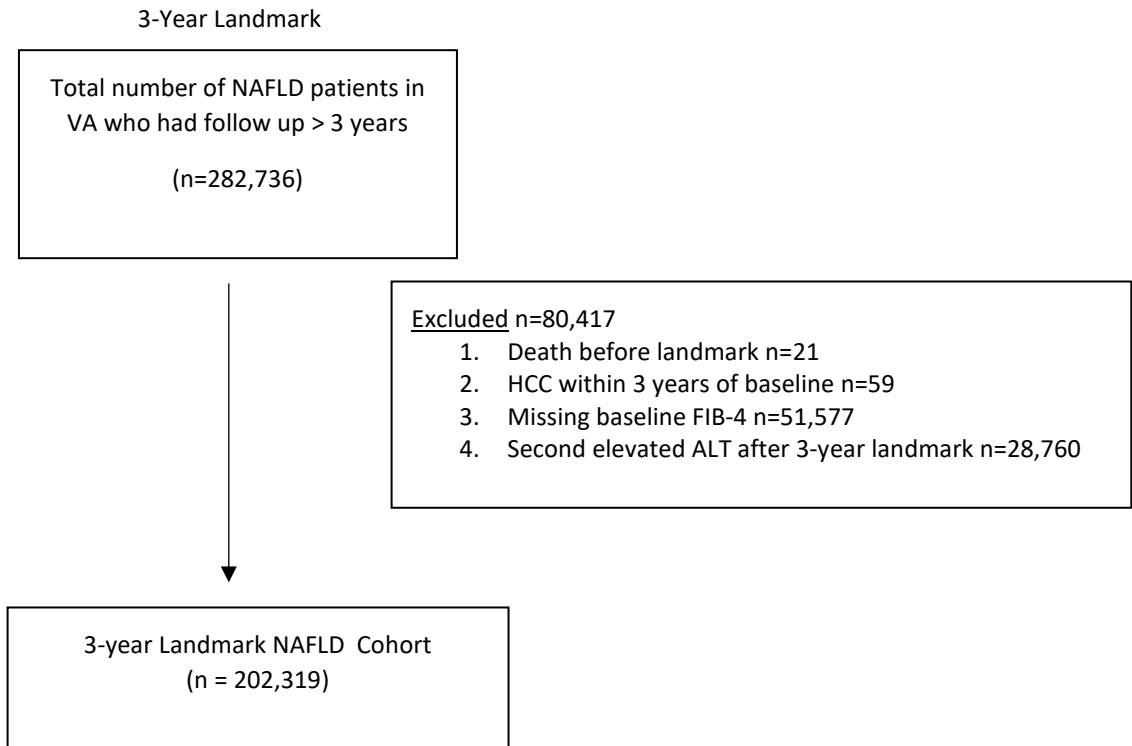

B

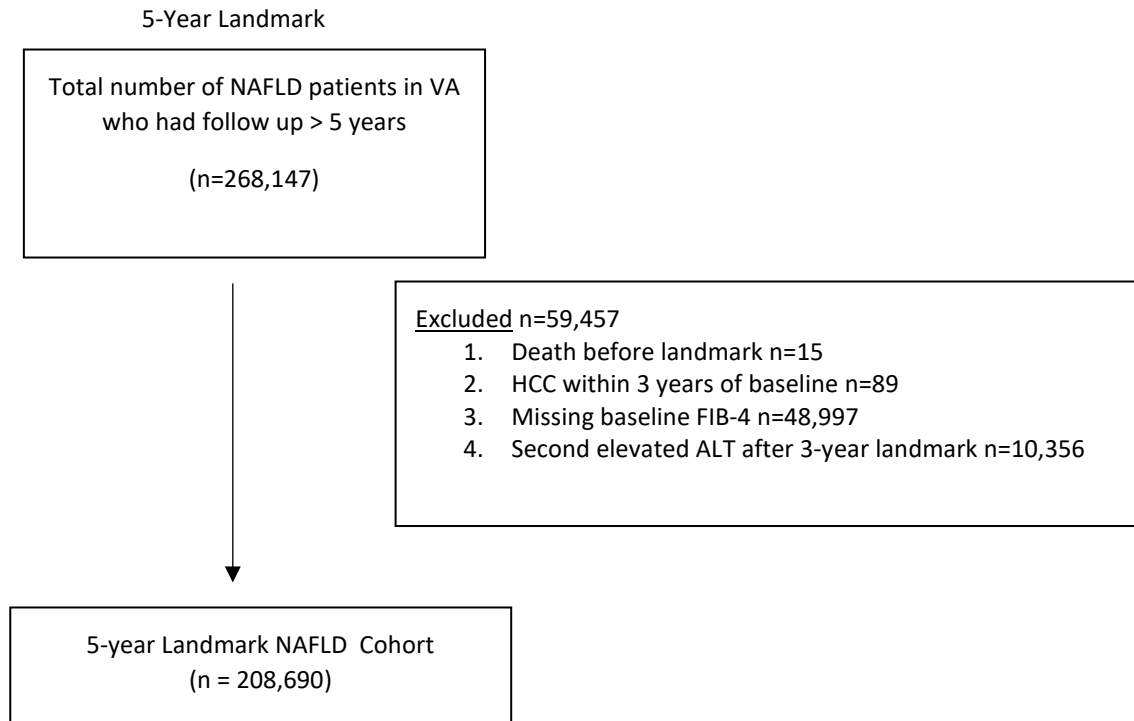

**Fig. S1:** Flow diagram describing inclusion and exclusion criteria to determine baseline NAFLD cohort and at 3- and 5-year landmark.

- A. 3-year landmark
- B. 5-year landmark

A

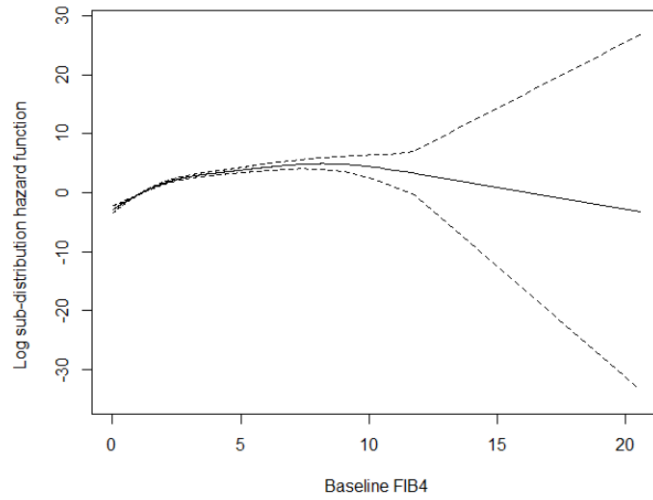

B

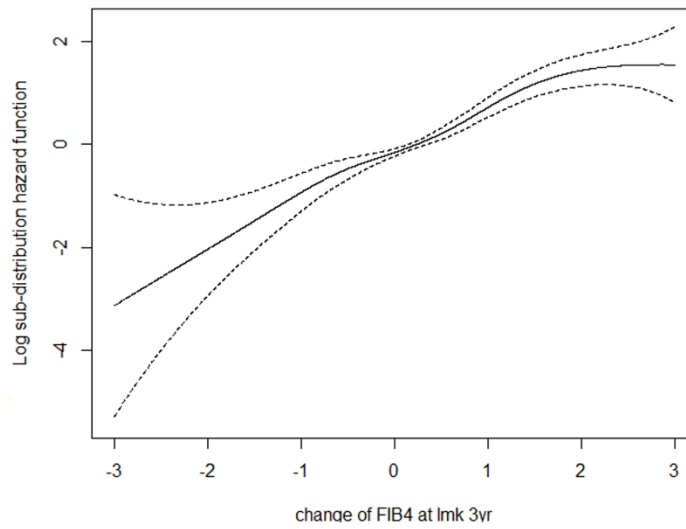

**Fig. S2:** Restricted cubic spline models reflecting FIB-4 score and the change in FIB-4 scores between baseline and follow-up as continuous variables and the rate of developing hepatocellular carcinoma between 2 time points.

- A. FIB-4 score as continuous variable
- B. Change in FIB-4 score

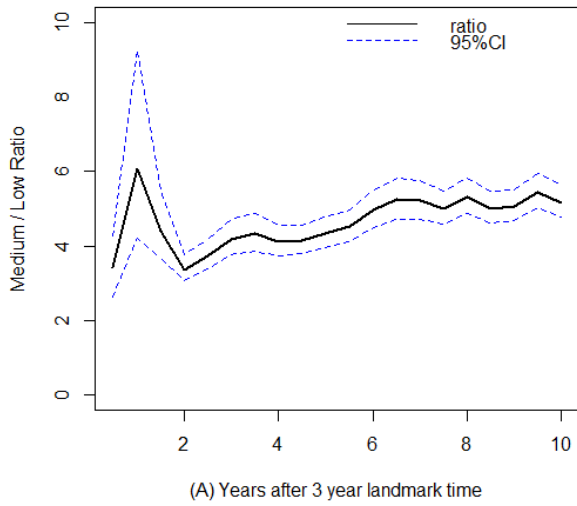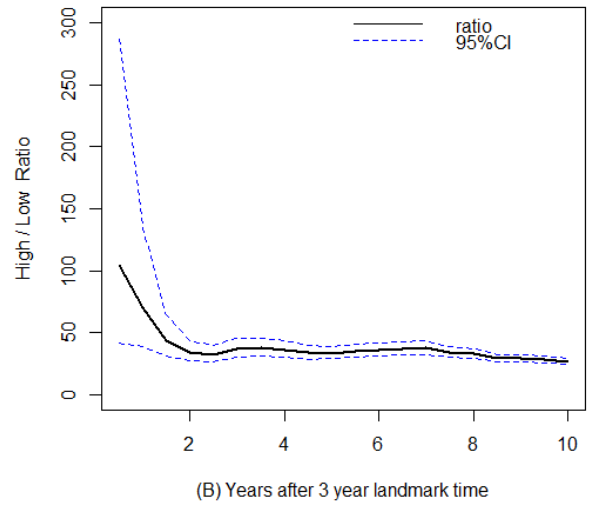

**Fig. S3:** Graphical check of the proportional hazard assumption

A. Indeterminate FIB-4 risk group compared to low (reference) FIB-4 risk group

B. High FIB-4 risk group compared to low (reference) FIB-4 risk group

**Table S1.** C-index at the landmark time of 3 and 5 years, with a prediction horizon of 2 and 5 years respectively

| c-index                               | 2-yr  | 5-yr  |
|---------------------------------------|-------|-------|
| 3- year landmark cohort<br>(N=202319) | 87.5% | 86.3% |
| 5-year landmark cohort<br>(N=208690)  | 89.9% | 86.8% |

**Table S2.** Association between fibrosis risk groups, defined based on FIB-4 values at baseline and 5-year landmark time, and subsequent risk for developing HCC in NAFLD patients.

| Baseline                               | 5-year landmark time       | N (%) <sup>a</sup> | HCC Events | HCC Incidence per 1,000 PY (95% C.I.) <sup>b</sup> | Baseline <sup>c</sup>               | 5-year landmark time       | N (%) <sup>a</sup> | Cirrhosis or HCC Events <sup>c</sup> | Cirrhosis or HCC Incidence per 1,000 PY (95% C.I.) <sup>b</sup> |
|----------------------------------------|----------------------------|--------------------|------------|----------------------------------------------------|-------------------------------------|----------------------------|--------------------|--------------------------------------|-----------------------------------------------------------------|
| <b>Overall cohort</b>                  |                            | 208690             | 403        | 0.29<br>(0.26, 0.32)                               | <b>Overall Cohort</b>               |                            | 207381             | 1660                                 | 1.21<br>(1.15, 1.27)                                            |
| <b>Low Risk</b><br>N=158089            | Low Risk                   | 115802<br>(73.3)   | 45         | 0.06<br>(0.04, 0.08)                               | <b>Low Risk</b><br>N=157684         | Low Risk                   | 115632<br>(73.3)   | 259                                  | 0.32<br>(0.29, 0.37)                                            |
|                                        | Indeterminate Risk         | 38613<br>(24.4)    | 45         | 0.17<br>(0.13, 0.23)                               |                                     | Indeterminate Risk         | 38465<br>(24.4)    | 294                                  | 1.14<br>(1.02, 1.28)                                            |
|                                        | High Risk                  | 3674<br>(2.3)      | 19         | 0.88<br>(0.53, 1.37)                               |                                     | High Risk                  | 3587<br>(2.3)      | 155                                  | 7.43<br>(6.31, 8.70)                                            |
| <b>Indeterminate Risk</b><br>N=43420   | Low Risk                   | 8362<br>(19.3)     | 13         | 0.25<br>(0.13, 0.43)                               | <b>Indeterminate Risk</b><br>N=4295 | Low Risk                   | 8316<br>(19.4)     | 52                                   | 1.01<br>(0.75, 1.32)                                            |
|                                        | Indeterminate Risk         | 26019<br>(59.9)    | 75         | 0.46<br>(0.36, 0.57)                               |                                     | Indeterminate Risk         | 25842<br>(60.2)    | 286                                  | 1.76<br>(1.56, 1.97)                                            |
|                                        | High Risk                  | 9039<br>(20.8)     | 106        | 2.05<br>(1.67, 2.47)                               |                                     | High Risk                  | 8793<br>(20.5)     | 364                                  | 7.31<br>(6.58, 8.10)                                            |
| <b>High Risk<sup>d</sup></b><br>N=7181 | Low/<br>Indeterminate Risk | 3232<br>(45.0)     | 13         | 0.70<br>(0.37, 1.19)                               | <b>High Risk</b><br>N=6746          | Low/<br>Indeterminate Risk | 3159<br>(456.8)    | 34                                   | 1.87<br>(1.30, 2.62)                                            |
|                                        | High Risk                  | 3949<br>(55.0)     | 87         | 4.29<br>(3.44, 5.30)                               |                                     | High Risk                  | 3587<br>(53.2)     | 216                                  | 11.76<br>(10.24, 13.43)                                         |

<sup>a</sup> Percentage (%) calculated with number within FIB-4 group at baseline as the denominator

<sup>b</sup> Incidence rate calculated using multiple imputed data

<sup>c</sup> Excluded patients who developed composite outcome (cirrhosis or HCC) prior to 3-year landmark time

<sup>d</sup> Data from high to low and indeterminate risk were combined due low number of patients and events in high to low risk group.



**Table S3.** Association between changes in FIB-4 and risk of HCC and composite outcome after 5-year landmark in NAFLD patients.

|                             | HCC outcome          |                         | Cirrhosis or HCC Outcome <sup>a</sup> |                         |
|-----------------------------|----------------------|-------------------------|---------------------------------------|-------------------------|
|                             | Unadjusted HR        | Adjusted HR<br>(95% CI) | Unadjusted HR<br>(95% CI)             | Adjusted HR<br>(95% CI) |
| <b>Change in FIB-4</b>      |                      |                         |                                       |                         |
| Low-Low                     | Reference            | Reference               | Reference                             | Reference               |
| Low-indeterminate           | 3.43 (2.19, 5.38)    | 3.05 (1.94, 4.79)       | 3.60 (3.04, 4.27)                     | 3.21 (2.71, 3.81)       |
| Low-High                    | 16.66 (9.43, 29.42)  | 14.04 (7.92, 24.89)     | 22.65 (18.53, 27.68)                  | 19.24 (15.71, 23.56)    |
| Indeterminate-low           | 4.10 (2.07, 8.15)    | 3.59 (1.80, 7.14)       | 2.85 (2.07, 3.93)                     | 2.49 (1.81, 3.44)       |
| Indeterminate-Indeterminate | 8.08 (5.42, 12.06)   | 6.88 (4.59, 10.32)      | 5.29 (4.44, 6.29)                     | 4.54 (3.81, 5.42)       |
| Indeterminate-High          | 34.03 (23.13, 50.07) | 28.27 (19.12, 41.78)    | 22.48 (19.03, 26.54)                  | 19.01 (16.07, 22.47)    |
| High-Lower                  | 9.58 (4.49, 20.45)   | 8.83 (4.13, 18.88)      | 5.74 (3.9, 8.47)                      | 5.29 (3.60, 7.78)       |
| High-High                   | 61.09 (40.35, 92.48) | 51.13 (33.54, 77.93)    | 34.36 (28.58, 41.3)                   | 29.64 (24.60, 35.70)    |
| <b>Race/Ethnicity</b>       |                      |                         |                                       |                         |
| White                       | Reference            | Reference               | Reference                             | Reference               |
| African-American            | 0.34 (0.20, 0.58)    | 0.42 (0.24, 0.72)       | 0.52 (0.43, 0.62)                     | 0.63 (0.52, 0.76)       |
| Hispanic                    | 1.07 (0.70, 1.65)    | 1.27 (0.83, 1.97)       | 1.12 (0.93, 1.35)                     | 1.35 (1.12, 1.63)       |
| Other                       | 0.99 (0.52, 1.89)    | 1.20 (0.63, 2.30)       | 0.69 (0.49, 0.99)                     | 0.84 (0.60, 1.19)       |
| Missing                     | -                    | -                       | -                                     | -                       |
| <b>Diabetes</b>             | 3.90 (3.08, 4.93)    | 2.67 (2.08, 3.44)       | 3.74 (3.37, 4.15)                     | 2.60 (2.32, 2.91)       |
| <b>Obesity, BMI &gt; 30</b> | 1.62 (1.30, 2.03)    | 1.52 (1.20, 1.91)       | 1.73 (1.56, 1.92)                     | 1.60 (1.44, 1.77)       |
| <b>Hypertension</b>         | 4.48 (2.71, 7.38)    | 1.74 (1.03, 2.96)       | 3.62 (2.95, 4.44)                     | 1.39 (1.12, 1.73)       |
| <b>Dyslipidemia</b>         | 1.26 (0.90, 1.77)    | 0.48 (0.34, 0.69)       | 1.52 (1.29, 1.78)                     | 0.63 (0.53, 0.74)       |

<sup>a</sup> Composite outcome of cirrhosis or HCC analyzed in NAFLD patients only without evidence of cirrhosis prior to landmark time

**Table S4.** Association between fibrosis risk groups, defined based on FIB-4 values at baseline and 3-year landmark time, and subsequent risk for developing HCC in NAFLD patients with and without cirrhosis.

| <b>Without Cirrhosis</b><br>N=199306 | <b>3-year Landmark<sup>a</sup></b> | <b>N (%)</b>  | <b>HCC Events (Total PY)</b>     | <b>HCC Incidence per 1,000 PY (95% C.I.)</b> |
|--------------------------------------|------------------------------------|---------------|----------------------------------|----------------------------------------------|
| <b>Low Risk</b><br>N=150139          | Low Risk                           | 119027 (79.3) | 42 (1024746.9)                   | 0.04 (0.03, 0.06)                            |
|                                      | Indeterminate/High Risk            | 31112 (20.7)  | 39 (249490.6)                    | 0.16 (0.11, 0.21)                            |
| <b>Indeterminate Risk</b><br>N=42215 | Low Risk                           | 9594 (22.7)   | 18 (76805.3)                     | 0.23 (0.14, 0.37)                            |
|                                      | Indeterminate Risk                 | 26080 (61.8)  | 77 (202512.2)                    | 0.38 (0.30, 0.48)                            |
|                                      | High Risk                          | 6541 (15.5)   | 31 (44474.4)                     | 0.70 (0.47, 0.99)                            |
| <b>High Risk</b><br>N=6952           | Low/Indeterminate Risk             | 3341 (48.1)   | 7 (23581.5)                      | 0.30 (0.12, 0.61)                            |
|                                      | High Risk                          | 3611 (51.9)   | 30 (22223.6)                     | 1.35 (0.91, 1.93)                            |
| <b>With Cirrhosis</b><br>N= 3013     | <b>3-year landmark</b>             | <b>N (%)</b>  | <b>HCC Events (Person Years)</b> | <b>HCC Incidence per 1,000 PY (95% C.I.)</b> |
| <b>Low Risk</b><br>N=1055            | Low Risk                           | 520 (49.3)    | 14 (4076.0)                      | 3.43 (1.88, 5.76)                            |
|                                      | Indeterminate/High Risk            | 535 (50.7)    | 22 (3705.0)                      | 5.94 (3.72, 8.99)                            |
| <b>Indeterminate Risk</b><br>N=1126  | Low/Indeterminate Risk             | 636 (56.5)    | 34 (4515.5)                      | 7.53 (5.21, 10.52)                           |
|                                      | High Risk                          | 490 (43.5)    | 59 (2991.3)                      | 19.72 (15.01, 25.44)                         |
| <b>High Risk</b><br>N=832            | Low/Indeterminate Risk             | 142 (17.2)    | 14 (967.1)                       | 14.48 (21.29, 32.87)                         |
|                                      | High Risk                          | 690 (82.9)    | 86 (3230.9)                      | 26.62 (21.29, 32.87)                         |

<sup>a</sup> Risk groups at landmark time were combined (low/indeterminate) due to low number of patients and events.

**Table S5.** Association between fibrosis risk groups, defined based on FIB-4 values at baseline and 3-year landmark time, and subsequent risk for developing HCC in NAFLD patients with normal ALT value and radiologic evidence of steatosis.

| Baseline                                      | 3-year landmark time   | N (%)          | Cirrhosis/HCC | Total PY | Cirrhosis/HCC Incidence per 1,000 PY (95% C.I.) |
|-----------------------------------------------|------------------------|----------------|---------------|----------|-------------------------------------------------|
| <b>Low Risk<sup>a</sup></b><br><b>N= 1504</b> | Low Risk               | 1197<br>(79.6) | 7             | 9467.8   | 0.74 (0.30, 1.52)                               |
|                                               | Indeterminate Risk     | 293<br>(19.5)  | 3             | 2209.7   | 1.36 (0.28, 3.97)                               |
| <b>Indeterminate Risk</b><br><b>N=499</b>     | Low Risk               | 71             | 1             | 542      | 1.85 (0.05, 10.28)                              |
|                                               | Indeterminate Risk     | 356            | 5             | 2658     | 1.88 (0.61, 4.39)                               |
|                                               | High Risk              | 72             | 2             | 489      | 4.09 (0.5, 14.77)                               |
| <b>High Risk</b><br><b>N= 67</b>              | Low-Indeterminate Risk | 2              | 1             | 144      | 6.93 (0.18, 38.62)                              |
|                                               | High Risk              | 65             | 7             | 432      | 16.21 (6.52, 33.4)                              |

<sup>a</sup>Data for a low to high risk group not presented because of limited number of patients in this group

**Table S6.** Association between fibrosis risk groups in NAFLD patients with non-missing FIB-4, at baseline and 3-year landmark time, and subsequent risk for developing HCC.

| Baseline                  | 3-year landmark time    | N (%)        | HCC Events | HCC Incidence per 1,000 PY (95% C.I.) |
|---------------------------|-------------------------|--------------|------------|---------------------------------------|
| <b>Overall cohort</b>     |                         | 147270       | 389        | 0.32 (0.29, 0.35)                     |
| <b>Low Risk</b>           | Low Risk                | 83853 (78.1) | 47         | 0.06 (0.05, 0.09)                     |
| <b>N=107415</b>           | Indeterminate/High Risk | 23562 (21.9) | 48         | 0.25 (0.19, 0.34)                     |
| <b>Indeterminate Risk</b> | Low Risk                | 7084 (20.9)  | 15         | 0.27 (0.15, 0.44)                     |
| <b>N=33814</b>            | Indeterminate Risk      | 21193 (62.7) | 94         | 0.57 (0.46, 0.70)                     |
| <b>High Risk</b>          | High Risk               | 5537 (16.4)  | 78         | 2.08 (1.64, 2.59)                     |
| <b>N=6041</b>             | Low/Indeterminate Risk  | 2665 (44.1)  | 13         | 0.69 (0.36, 1.17)                     |
|                           | High Risk               | 3376 (55.9)  | 94         | 4.61 (3.73, 5.65)                     |

**Table S7.** Comparison of clinical characteristics of patients with and without FIB-4 measurements at baseline, for 3-year and 5-year landmark cohort.

|                             | 3-year Landmark        |                                 |          | 5-year Landmark         |                                  |          |
|-----------------------------|------------------------|---------------------------------|----------|-------------------------|----------------------------------|----------|
|                             | With FIB-4<br>N=147270 | Missing<br>any FIB-4<br>N=55049 | <i>P</i> | With FIB-4<br>N= 149954 | Missing<br>any FIB-4<br>N= 58736 | <i>P</i> |
| <b>N new HCC</b>            | 389<br>(0.3)           | 84<br>(0.2)                     | <0.001   | 346<br>(0.2)            | 57<br>(0.1)                      | <0.001   |
| <b>Age in years, SD</b>     | 59.3<br>(12.3)         | 55.2<br>(13.9)                  | <0.001   | 60.7<br>(12.2)          | 57.0<br>(14.1)                   | <0.001   |
| <b>Gender</b>               |                        |                                 | <0.001   |                         |                                  | <0.001   |
| Female                      | 9105<br>(6.2)          | 3183<br>(5.8)                   |          | 9071<br>(6.1)           | 3373<br>(5.7)                    |          |
| Male                        | 138165<br>(93.8)       | 51866<br>(94.2)                 |          | 140883 (93.9)           | 55363<br>(94.3)                  |          |
| <b>Ethnicity/Race</b>       |                        |                                 | <0.001   |                         |                                  | <0.001   |
| <b>White</b>                | 104101<br>(70.7)       | 36484<br>(66.3)                 |          | 106088 (70.8)           | 38953<br>(66.3)                  |          |
| <b>African-American</b>     | 16625<br>(11.30)       | 6422<br>(11.7)                  |          | 17619<br>(11.8)         | 7020<br>(11.9)                   |          |
| <b>Hispanic</b>             | 8427<br>(5.7)          | 3238 (5.9)                      |          | 8768 (5.9)              | 3305<br>(5.6)                    |          |
| <b>Other</b>                | 3831<br>(2.6)          | 1661 (3.0)                      |          | 3952 (2.6)              | 1774<br>(3.0)                    |          |
| <b>Missing</b>              | 14286<br>(9.7)         | 7244<br>(13.2)                  |          | 13527 (9.0)             | 7684<br>(13.1)                   |          |
| <b>Cirrhosis</b>            | 939<br>(0.6)           | 156<br>(0.3)                    | <0.001   | 1125<br>(0.8)           | 184<br>(0.3)                     | <0.001   |
| <b>Diabetes</b>             | 58115<br>(39.5)        | 15477<br>(28.1)                 | <0.001   | 64562<br>(43.1)         | 18550<br>(31.6)                  | <0.001   |
| <b>Obesity, BMI &gt; 30</b> | 84299<br>(57.2)        | 21358<br>(38.8)                 | <0.001   | 85952<br>(57.3)         | 20936<br>(35.6)                  | <0.001   |
| <b>Hypertension</b>         | 121647<br>(82.6)       | 38581<br>(70.1)                 | <0.001   | 128166<br>(85.5)        | 43277<br>(73.3)                  | <0.001   |
| <b>Dyslipidemia</b>         | 125489<br>(85.2)       | 40986<br>(74.5)                 | <0.001   | 133358 (88.9)           | 46132<br>(78.5)                  | <0.001   |
